# Supplementary material for: Nanoengineering of electrodes via infiltration: an opportunity for developing large-area solid oxide fuel cells with high power density
Source: Royal Society of Chemistry journal article supplement (doi:10.1039/d3nr02704j), 2023-01-01
Supplement: d3nr02704j1.pdf [file d3nr02704j1.pdf]

**Supporting information:**

**Nanoengineering of electrodes via infiltration: an opportunity for developing large-area solid oxide fuel cells with high power density**

Xiaofeng Tong <sup>\*a,b</sup>, Chen Li <sup>a</sup>, Kaikuo Xu <sup>a</sup>, Ningling Wang <sup>a</sup>, Karen Brodersen <sup>b</sup>, Zhibin Yang <sup>c</sup>, Ming Chen <sup>\*b</sup>

<sup>a</sup> *Institute of Energy Power Innovation, North China Electric Power University, Beijing 102206, China. E-mail: xiaofeng.tong@ncepu.edu.cn*

<sup>b</sup> *Department of Energy Conversion and Storage, Technical University of Denmark, Kgs. Lyngby 2800, Denmark. E-mail: minc@dtu.dk*

<sup>c</sup> *Research Center of Solid Oxide Fuel Cell, China University of Mining and Technology-Beijing, Beijing 100083, China*

\* Corresponding author

**Initial characterizations:**

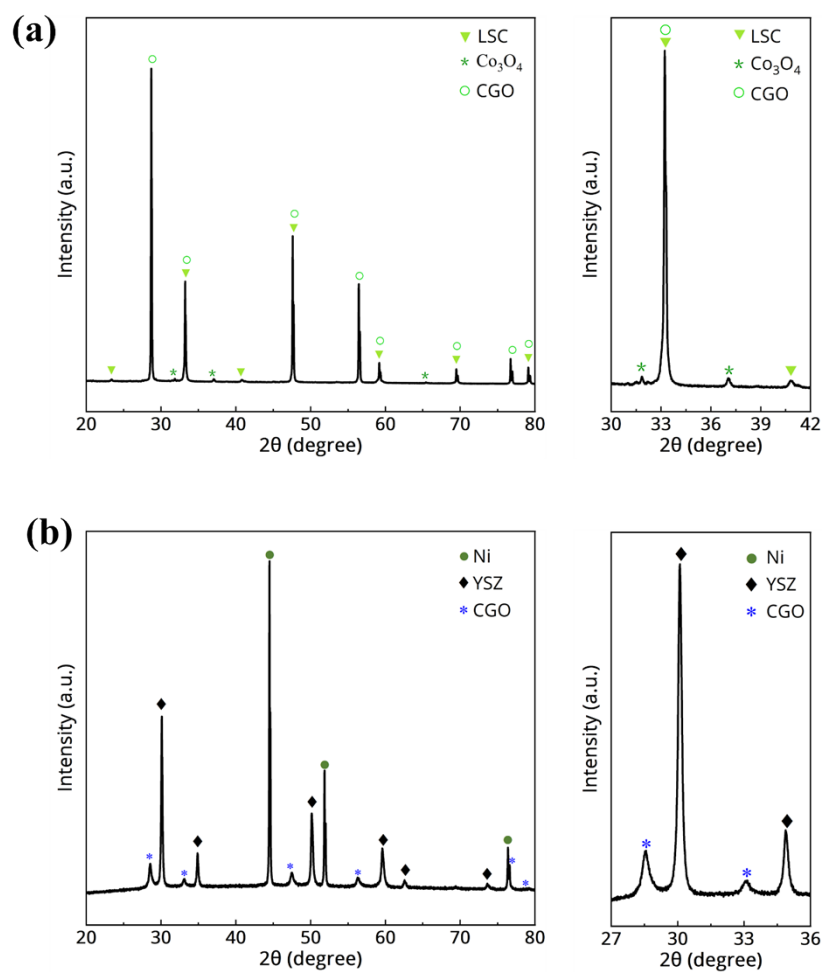

Figure S1. The XRD pattern obtained on the (a) LSC/Co<sub>3</sub>O<sub>4</sub>-CGO cathode and (b) CGO-Ni/YSZ anode.

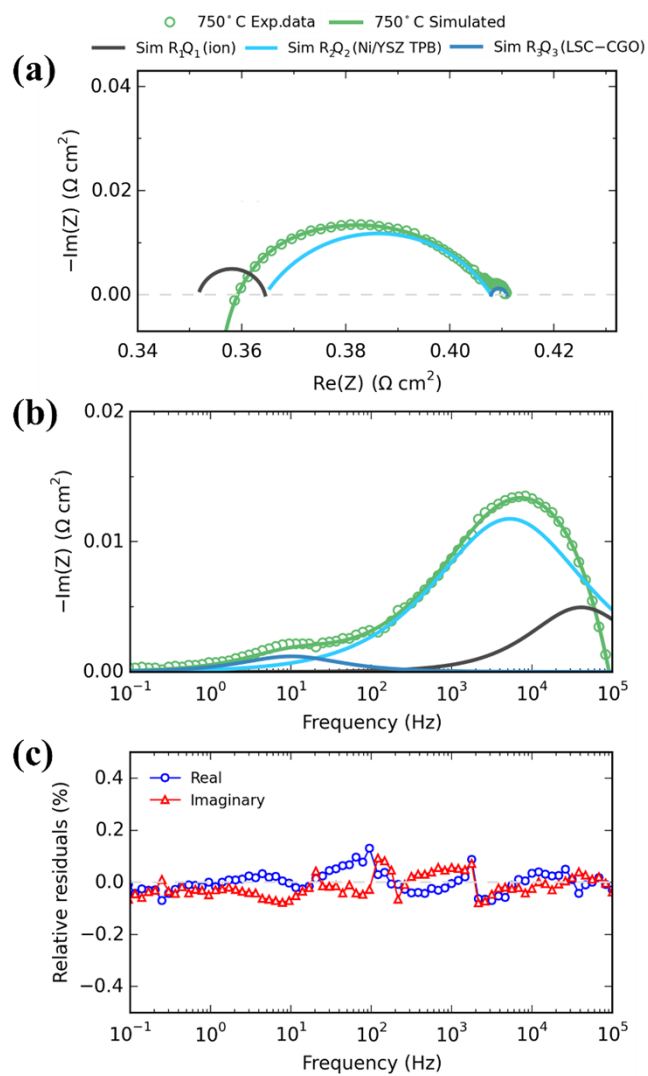

Figure S2. (a) CNLS fits of inductance corrected impedance spectra of the symmetrical cell obtained under OCV at 750 °C in dry air. (b) The corresponding Bode plots. (c) The relative residual plots.

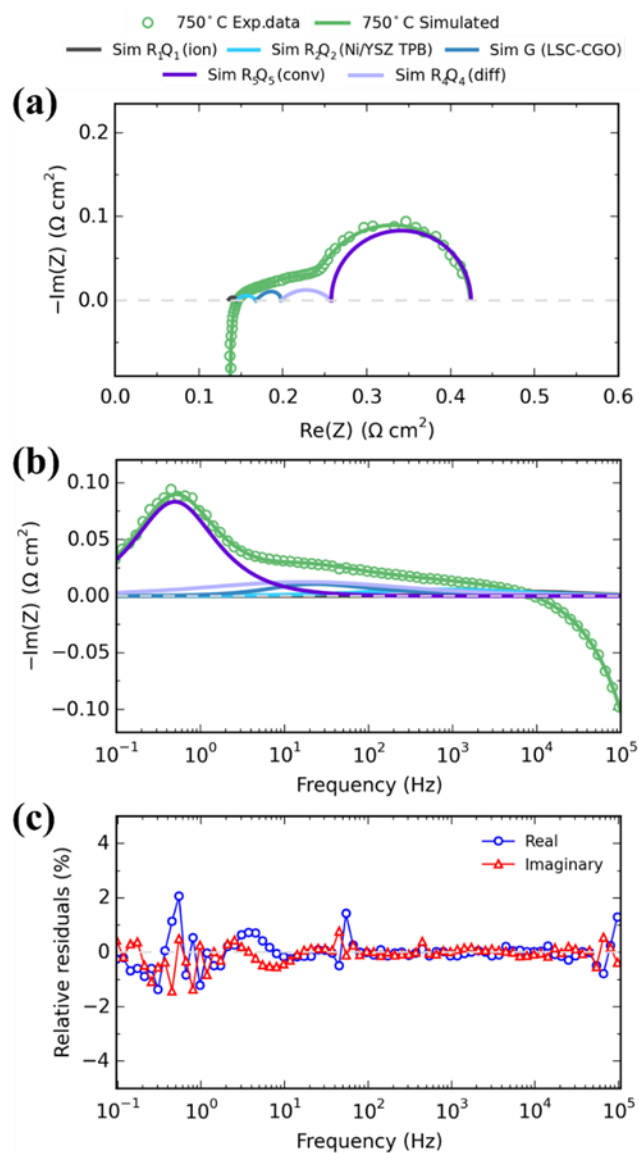

Figure S3. (a) CNLS fits of inductance corrected impedance spectra of the full cell obtained under OCV at 750 °C with 4% $\text{H}_2\text{O}$ -96% $\text{H}_2$  supplied to the anode and dry air to the cathode in dry air. (b) The corresponding Bode plots. (c) The relative residual plots.

Table S1 Electrochemical performance of the Ni/YSZ anode-supported solid oxide fuel cells

| Half-cell configuration | Cathode    | Active area (cm <sup>2</sup> ) | Temperature (°C) | Power density at 0.6V (W cm <sup>-2</sup> ) | $R_p$ ( $\Omega$ cm <sup>2</sup> ) | Ref. |
|-------------------------|------------|--------------------------------|------------------|---------------------------------------------|------------------------------------|------|
| Ni/YSZ YSZ GDC          | LSCF-1     | 100                            | 740              | 0.42                                        |                                    | 1    |
| Ni/YSZ YSZ              | LSCF-2     | 79.21                          | 800              | 0.263                                       | 1.182                              | 2    |
| Ni/YSZ Ni/SSZ SSZ CGO   | LSCF/CGO-1 | 100                            | 750              | 0.483                                       | 1.210                              | 3    |
|                         |            |                                | 700              | 0.325                                       | 1.830                              |      |
|                         |            |                                | 650              | 0.2                                         | 2.430                              |      |
| Ni/YSZ YSZ CGO          | LSCF/CGO-2 | 100                            | 720              | 0.354                                       | 3.00                               | 4    |
| Ni/YSZ YSZ CGO          | LSCF/CGO-3 | 7.065                          | 700              | 0.27<br>(at 0.72V)                          | 0.475                              | 5    |
|                         |            |                                | 650              | 0.25<br>(at 0.65V)                          | 0.445                              |      |
|                         |            |                                | 600              | 0.161                                       | 0.814                              |      |
| Ni/YSZ YSZ              | LSCF/CGO-4 | 0.5                            | 850              | 0.524                                       | 1.143                              | 6    |
|                         |            |                                | 800              | 0.427                                       | 1.138                              |      |
|                         |            |                                | 750              | 0.321                                       | 1.403                              |      |
| Ni/YSZ YSZ              | LSCF/CGO-5 | 0.5                            | 800              | 0.433                                       | 0.954                              | 7    |
| Ni/YSZ YSZ              | LSCF/CGO-6 | 0.5                            | 800              | 0.391                                       | 0.455                              | 8    |
|                         |            |                                | 750              | 0.319                                       | 0.684                              |      |
|                         |            |                                | 700              | 0.291                                       | 0.747                              |      |
| Ni/YSZ YSZ              | LSCF-YSZ-1 | 81                             | 750              | 0.469                                       |                                    | 9    |
|                         |            |                                | 700              | 0.411                                       |                                    |      |
|                         |            |                                | 650              | 0.366                                       |                                    |      |
|                         |            |                                | 600              | 0.298                                       |                                    |      |
| Ni/YSZ YSZ              | LSCF-YSZ-2 | 16                             | 800              | 0.831<br>(at 0.7V)                          | 0.670                              | 10   |
| Ni/YSZ YSZ              | LSCF-YSZ-3 | 16                             | 800              | 0.558<br>(at 0.7V)                          |                                    | 11   |
| Ni/YSZ YSZ              | LSCF-YSZ-4 | 0.2                            | 800              | 0.877                                       | 0.202                              | 12   |
|                         |            |                                | 750              | 0.754                                       | 0.257                              |      |

|                |             |     |     |       |       |    |
|----------------|-------------|-----|-----|-------|-------|----|
|                |             |     | 700 | 0.626 | 0.343 |    |
| Ni/YSZ YSZ     | LSM/SSZ     | 2   | 800 | 0.762 | 0.620 | 13 |
|                |             |     | 750 | 0.516 | 0.890 |    |
|                |             |     | 700 | 0.278 | 1.280 |    |
|                |             |     | 700 | 0.278 | 1.280 |    |
| Ni/YSZ YSZ     | LSF-YSZ     | 0.5 | 800 | 0.611 | 0.260 | 14 |
|                |             |     | 750 | 0.47  | 0.550 |    |
|                |             |     | 700 | 0.362 | 0.810 |    |
| Ni/YSZ YSZ     | LCN-CGO-YSZ | 16  | 700 | 0.657 |       | 15 |
|                | LCN-CGO-YSZ | 16  | 700 | 0.686 | 0.550 |    |
|                | LCN-CGO-YSZ | 16  | 700 | 0.974 | 0.460 |    |
|                | LSC-CGO-YSZ | 16  | 700 | 1.026 | 0.357 |    |
| Ni/YSZ YSZ     | LSC/CGO     | 16  | 700 | 0.532 |       | 16 |
|                |             |     | 650 | 0.383 |       |    |
|                |             |     | 600 | 0.245 |       |    |
| Ni/YSZ YSZ CGO | LSC-CGO     | 16  | 800 | 1.34  | 0.260 | 17 |
|                |             |     | 750 | 1.08  | 0.300 |    |
|                |             |     | 700 | 0.7   | 0.380 |    |

$La_{0.6}Sr_{0.4}Co_{0.2}Fe_{0.8}O_{3-\delta}$  (LSCF),  $La_{0.8}Sr_{0.2}MnO_3$  (LSM),  $Zr_{0.89}Sc_{0.1}Ce_{0.01}O_{2-\delta}$  (SSZ),  $La_{0.6}Sr_{0.4}FeO_{3-\delta}$  (LSF),  $La_{0.6}Sr_{0.4}CoO_{3-\delta}$  (LSC).

## References

- 1 Zewei Lyu, Shixue Liu, Yige Wang, Hangyue Li, Zhijing Liu, Zaihong Sun, Kaihua Sun, Shuxing Zhang, and Minfang Han, *J. Power Sources*, 2021, **510**, 230432.
- 2 Juan Zhou, Qinglin Liu, Lan Zhang, and Siew Hwa Chan, *Int. J. Hydrogen Energy*, 2016, **41**, 18203–18206.
- 3 Amjad Hussain, Muhammad Zubair Khan, Rak Hyun Song, Jong-Eun Hong, Seung-Bok Lee, and Tak-Hyoung Lim, *Ecs Trans.*, 2019, **91**, 373–379.
- 4 Jihao Zhang, Libin Lei, Hangyue Li, Kaihua Sun, Zaihong Sun, and Minfang Han, *J. Power Sources*, 2021, **516**, 230678.
- 5 Sungmin Kang, Jaeseok Lee, Gu Young Cho, Yusung Kim, Sanghun Lee, Suk Won Cha, and Joongmyeon Bae, *Int. J. Hydrogen Energy*, 2020, **45**, 33980–33992.
- 6 J. Zhou, Q. Liu, Q. Sun, and S. Hwa Chan, *Fuel Cells*, 2014, **14**, 667–670.
- 7 Chao Liu, *Int. J. Electrochem. Sci.*, 2019, 11571–11579.
- 8 Yige Wang, Chuan Jia, Zewei Lyu, Minfang Han, Junwei Wu, Zaihong Sun, Fumitada Iguchi, Keiji Yashiro, and Tatsuya Kawada, *Journal of Materiomics*, 2022, **8**, 347–357.
- 9 Jing Chen, Fengli Liang, Dong Yan, Jian Pu, Bo Chi, San Ping Jiang, and Li Jian, *J. Power Sources*, 2010, **195**, 5201–5205.
- 10 Chuan Jia, Ming Chen, and Minfang Han, *Int. J. Appl. Ceram. Technol.*, 2017, **14**, 1006–1012.
- 11 Yongliang Zhang, Minfang Han, and Zaihong Sun, *Int. J. Hydrogen Energy*, 2020, **45**, 5554–5564.
- 12 Hui Fan, Michael Keane, Na Li, Dan Tang, Prabhakar Singh, and Minfang Han, *Int. J. Hydrogen Energy*, 2014, **39**, 14071–14078.
- 13 Chengcheng Wang, Linghong Luo, Yefan Wu, Bingxue Hou, and Liangliang Sun, *Mater. Lett.*, 2011, **65**, 2251–2253.
- 14 Hui Fan, Yongliang Zhang, and Minfang Han, *J. Alloys Compd.*, 2017, **723**, 620–626.
- 15 Simona Ovtar, Anne Hauch, Sune Veltzé, and Ming Chen, *Electrochim. Acta*, 2018, **266**, 293–304.
- 16 Youkun Tao, Jing Shao, Wei Guo Wang, and Jianxin Wang, *Fuel Cells*, 2009, **9**, 679–683.
- 17 Xiaofeng Tong, Simona Ovtar, Karen Brodersen, Peter Vang Hendriksen, and Ming Chen, *J. Power Sources*, 2020, **451**, 227742.
